1 **Prediction of migratory routes of the invasive fall armyworm in eastern China**  
2 **using a trajectory analytical approach**

3

4 Xi-Jie Li,<sup>a†</sup> Ming-Fei Wu,<sup>a†</sup> Jian Ma,<sup>a</sup> Bo-Ya Gao,<sup>a,b</sup> Qiu-Lin Wu,<sup>c</sup> Ai-Dong Chen,<sup>d</sup> Jie  
5 Liu,<sup>e</sup> Yu-Ying Jiang,<sup>e</sup> Bao-Ping Zhai,<sup>a</sup> Regan Early,<sup>b</sup> Jason W. Chapman<sup>b,a</sup> and Gao  
6 Hu<sup>a\*</sup>

7

8 <sup>a</sup> *College of Plant Protection, Nanjing Agricultural University, Nanjing 210095, China*

9 <sup>b</sup> *Centre of Ecology and Conservation, University of Exeter, Penryn, Cornwall TR10*  
10 *9FE, UK*

11 <sup>c</sup> *Institute of Plant Protection, Chinese Academy of Agricultural Sciences, Beijing*  
12 *100193*

13 <sup>d</sup> *Agricultural Environment and Resources Institute, Yunnan Academy of Agricultural*  
14 *Sciences, Kunming 650205, China*

15 <sup>e</sup> *Division of Pest Forecasting, China National Agro-Tech Extension and Service*  
16 *Center, Beijing 100026, China*

17 † These authors have contributed equally to this work

18 \* Correspondence to: Gao HU, College of Plant Protection, Nanjing Agricultural  
19 University, 1 Weigang Road, Nanjing 210095, China. E-mail: hugao@njau.edu.cn

20 **Abstract**

21 **BACKGROUND:** The fall armyworm (FAW), an invasive pest from the Americas, is rapidly  
22 spreading through the Old World, and has recently invaded the Indochinese Peninsula  
23 and southern China. In the Americas, FAW migrates from winter-breeding areas in the  
24 south into summer-breeding areas throughout North America where it is a major pest of  
25 corn. Asian populations are also likely to evolve migrations into the corn-producing regions  
26 of eastern China, where they will pose a serious threat to food security.

27

28 **RESULTS:** To evaluate the invasion risk in eastern China, the rate of expansion and future  
29 migratory range was modelled by a trajectory simulation approach, combined with flight  
30 behaviour and meteorological data. Our results predict that FAW will migrate from its new  
31 year-round breeding regions into the two main corn-producing regions of eastern China  
32 (the North China and Northeast China Plains), via two pathways. The western pathway  
33 originates in Myanmar and Yunnan, and FAW will take four migration steps to reach the  
34 North China Plain by July. Migration along the eastern pathway from Indochina and  
35 southern China progresses faster, with FAW reaching the North China Plain in three steps  
36 by June and reaching the Northeast China Plain in July.

37

38 **CONCLUSION:** Our results indicate that there is a high risk that FAW will invade the major  
39 corn-producing areas of eastern China via two migration pathways, and cause significant  
40 impacts to agricultural productivity. Information on migration pathways and timings can be  
41 used to inform integrated pest management strategies for this emerging pest.

42 **Keywords:** *Spodoptera frugiperda*, Asian migration arena, East Asian monsoon, invasive

43 species

## 44 1 INTRODUCTION

45 The fall armyworm (FAW), *Spodoptera frugiperda* (J. E. Smith), is a pest noctuid moth that  
46 principally attacks corn (maize) but has a wide host range. It is native to the New World,  
47 where it breeds continuously in tropical and sub-tropical regions of the Americas, but also  
48 has migratory populations that invade temperate North America every spring.<sup>1, 2</sup> In  
49 January 2016 an outbreak of FAW was discovered in West Africa (Nigeria and Ghana),  
50 and since this initial outbreak it has spread throughout the Old World at a phenomenal rate.  
51 Within two years of arriving in West Africa it had reached almost all countries in  
52 sub-Saharan Africa.<sup>3-5</sup> In May 2018, FAW were discovered in Karnataka in southwest India,  
53 and by late-2018 FAW outbreaks had been found considerably further east, in Myanmar  
54 and northern Thailand.<sup>6-8</sup> Its presence in China was confirmed when larvae found in corn  
55 in southwest Yunnan province (southwest China) were identified in January 2019 as  
56 FAW.<sup>9, 10</sup> By April 2019 it had spread through much of Yunnan, and also reached the  
57 southern Chinese provinces of Guangxi, Guangdong, Guizhou and Hunan (see Fig. 1), as  
58 well as Laos and Vietnam.<sup>11, 12</sup>

59 FAW can survive over-winter throughout most of Southeast Asia (Myanmar, Thailand,  
60 Laos, Cambodia and Vietnam) and also in the sub-tropical provinces of China (Yunnan,  
61 Guangxi, Guangdong, Hainan, Fujian and Taiwan) lying approximately south of the Tropic  
62 of Cancer.<sup>13</sup> It is highly likely that FAW populations breeding year-round in these regions  
63 will evolve annual spring migrations northwards into eastern China (and presumably south  
64 again the following autumn), just as FAW populations in North America migrate annually  
65 between the northernmost winter-breeding areas (south Texas and south Florida) and the

66 northern United States.<sup>1,2</sup>

67       The caterpillars of FAW have a very wide host range, and are known to damage more  
68 than 180 species of plants.<sup>14</sup> Corn is the preferred host, and yield losses of between 15–73%  
69 are typically caused by FAW outbreaks in corn.<sup>14, 15</sup> Recent studies of projected yield loss  
70 in Africa, combined across twelve major corn-producing sub-Saharan countries, indicated  
71 that between 4.1–17.7 million tons of corn, with a value of \$1.09–4.66 billion, will be lost  
72 annually due to the newly-invasive FAW populations.<sup>3, 4</sup> China is the second largest corn  
73 producer in the world, and corn is the third commonest crop after rice and wheat in China,  
74 where it is grown in all provinces. The main corn-growing areas are the North China Plain  
75 (mainly the provinces of Henan, Shandong and Hebei, see Fig. 1) and the Northeast  
76 China Plain (Liaoning, Jilin and Heilongjiang, see Fig. 1) in eastern China, and these  
77 regions (plus the Korean Peninsula and Japan) are potentially suitable for  
78 summer-breeding populations<sup>13</sup> if FAW can reach them. Therefore, Chinese agricultural  
79 production and food security will be seriously threatened if FAW evolve a regular migratory  
80 route which will allow them to exploit the principal corn-producing regions of East Asia to  
81 the north and east of the current distribution.

82       International trade is considered to be an important cause of the rapid expansion of  
83 FAW.<sup>13</sup> In addition, this species has the capability to achieve natural long-distance range  
84 expansion, as adults can migrate hundreds or even thousands of kilometres on  
85 high-altitude winds over several successive nights;<sup>1,2</sup> for example, FAW were reported to  
86 be transported by low-level jets from Mississippi in the southern United States to southern  
87 Canada, a distance of 1,600 kilometers.<sup>16</sup> Although it is unlikely that natural windborne

88 migration was responsible for the moths crossing the Atlantic and Indian Oceans to  
89 colonize Africa and India respectively, natural migration is hugely important for their spread  
90 within Africa, and during their invasion of East and Southeast Asia.<sup>4</sup> European countries  
91 are worried about the very real possibility that the moths will migrate to Europe after they  
92 breed successfully in North Africa.<sup>17</sup>

93 Now that FAW have arrived in Southeast Asia and southern China, there is a very high  
94 possibility that they will invade eastern China on an annual basis. Two main migratory  
95 routes are possible: a western and an eastern route. The western route involves  
96 windborne transport from the westerly winter-breeding region (Myanmar / Yunnan), via  
97 Guizhou and Sichuan and on into eastern China (Fig. 1). The eastern route originates from  
98 the easterly winter-breeding region (northern Thailand, Laos, Vietnam, Guangxi and  
99 Guangdong), and involves transport on favourable winds associated with movement of the  
100 Asian monsoon via east-central China, and on into the main corn producing areas (the  
101 North China and Northeast China Plains) (Fig. 1). The eastern route is the important  
102 migratory pathway for many migratory pest moths in China, including beet armyworm  
103 *Spodoptera exigua*,<sup>18</sup> beet webworm *Loxostege sticticalis*,<sup>19</sup> cotton bollworm *Helicoverpa*  
104 *armigera*,<sup>20</sup> Oriental armyworm *Mythimna separata*<sup>21-24</sup> and rice leaf roller *Cnaphalocrocis*  
105 *medinalis*.<sup>25</sup> As is the case for these other migratory pests, at these latitudes FAW can only  
106 breed successfully in the summer and cannot survive overwinter, and so these regions will  
107 need to be reinvaded on an annual basis.<sup>2, 13, 26</sup> Hence, the question of whether FAW can  
108 evolve a regular, seasonal round-trip migration between the year-round breeding zone in  
109 Southeast Asia / southern China, and the potential summer-breeding zones in North and

110 Northeast China is the key to whether they can cause frequent and wide-scale crop  
111 damage in China. However, East Asia would appear to be a very suitable region for the  
112 development of long-distance annual migrations of FAW, for four reasons. Firstly, the  
113 maize producing regions of eastern China lie at a similar latitude and have similar climate  
114 to the FAW native migratory range in the USA. Secondly, East Asia has a wide extent of  
115 tropical and subtropical regions on the Indochina Peninsula and in southern China, which  
116 provide a favourable environment for FAW to maintain large populations over the winter.  
117 Thirdly, there is a continuous agricultural ecosystem spanning a large latitude range in  
118 Southeast and East Asia with year-round production of suitable crops (corn, sugarcane,  
119 rice, etc) enabling continuous breeding if FAW can move between regions. Finally, the  
120 annual East Asian summer monsoon provides a 'highway' of favourable winds for the  
121 airborne transport of migratory organisms, towards the north in the spring and returning  
122 south in the autumn. Taken together, this means the recent colonisation of Southeast Asia  
123 and southern China is very likely to result in the emergence of a round-trip migratory cycle  
124 that will exploit the seasonal resources available in eastern China. China is therefore  
125 facing a great risk to its food security and agricultural productivity due to the invasion of  
126 FAW into the region. It is thus important to identify the migration routes, timing of the  
127 seasonal movements, and potential summer-breeding range of FAW in eastern China, in  
128 order to design strategies to monitor and control this pest. In this study we predict the  
129 future migratory pathways of FAW using trajectory simulations modified to take account of  
130 FAW migration behaviour.

131

## 132 **2 METHODS**

133 We identified the potential endpoints of FAW moth migrations by calculating forward flight  
134 trajectories from source areas where FAW are currently known to be breeding, or from  
135 potential future source areas we predict they will breed in the near future. To improve the  
136 accuracy of the trajectory simulations, we developed a new numerical trajectory model  
137 that takes account of flight behaviour and self-powered flight vectors (as these are known  
138 to substantially alter trajectory pathway<sup>27, 28</sup>), and trajectory calculation is driven by high  
139 spatio-temporal resolution weather conditions simulated by the Weather Research and  
140 Forecasting (WRF) model.<sup>29</sup> This trajectory model has been used successfully for many  
141 other insect migrants, such as corn earworm (*Helicoverpa zea*), Oriental armyworm, rice  
142 leaf roller, and rice planthoppers.<sup>24, 25, 29-33</sup> The program for calculating trajectories was  
143 designed in FORTRAN<sup>24, 29, 31</sup> and run under CentOS 7.4 on a server platform (IBM  
144 system x3500 M4).

145

### 146 **2.1. Weather Research and Forecasting model**

147 The Weather Research and Forecasting (WRF) model (version 3.8, [www.wrf-model.org](http://www.wrf-model.org))  
148 was used to produce a high-resolution atmospheric background for trajectory calculation.  
149 The WRF is an advanced meso-scale numerical weather prediction system  
150 (<https://www.mmm.ucar.edu/weather-research-and-forecasting-model>).<sup>34</sup> In this study, the  
151 dimensions of the model domain were 140 ×150 grid points at a resolution of 30 km.  
152 Twenty-nine vertical layers were available and the model ceiling was 100 hPa. More detail  
153 of the scheme selection and parameters for the modelling are listed in



154 Supplementary Table S1 and Fig. S1. National Centers for Environmental Prediction  
155 (NCEP) Final Analysis (FNL) data was used as the meteorological data for the model input.  
156 FNL is a six-hourly, global, 1-degree grid meteorological dataset. The model forecast time  
157 is 72 h with data outputs at 1 h intervals, for horizontal and vertical wind speeds,  
158 temperature and precipitation.

159

## 160 **2.2. Self-powered flight behaviours of FAW**

161 The flight behaviour of FAW were included in the trajectory simulation by making the  
162 following assumptions. (i) Nocturnal moths perform 'multi-stop' migration, in which moths  
163 only take off at dusk, terminate migratory flight the following dawn, and then take-off again  
164 at the next dusk.<sup>25, 27, 28</sup> FAW here was assumed to take off at 20:00 Beijing Time (BJT),  
165 stop at 06:00 BJT, and fly for three consecutive nights whenever temperature conditions  
166 were suitable (see below). (ii) Other species of similar-sized noctuid moth pests have a  
167 self-powered flight speed of about 2.5–4 m/s.<sup>27, 35, 36</sup> Therefore, we added a self-powered  
168 flight vector of 3.0 m/s in the trajectory modelling. As we don't know if the Asian FAW  
169 moths have a preferred flight heading, we assumed that the flight vector will be aligned  
170 with the downwind direction. (iii) Radar studies of FAW in the USA<sup>1, 37-39</sup>, and of similar  
171 noctuid moth pests elsewhere<sup>27, 35</sup>, show that these moths typically migrate at the altitude  
172 of the of the low-level jet where wind speeds are relatively fast (often >10 m/s). We did not  
173 explore altitudinal profiles of wind speeds before trajectory modelling, and thus to ensure  
174 we would capture the most likely flight height, we started trajectories from eight different  
175 altitudes: 500, 750, 1000, 1250, 1500, 1750, 2000 and 2250 m above mean sea level

176 (amsl). In the eastern pathway we only calculated trajectories at heights from 500–1500 m  
177 amsl as ground heights in this region are relatively low, but we used all 8 altitudes for the  
178 western pathway as much of the land in this region (particularly in Yunnan) is >1000 m  
179 amsl. We assumed that FAW cannot fly when the air temperature at flight altitude falls  
180 below 13.8 °C, the minimum temperature for survival of FAW<sup>13,40</sup>, and so trajectories were  
181 terminated on any night/height combination which dropped below this temperature.

182

### 183 **2.3. Departure points for forward trajectories**

184 We investigated the two main potential migratory pathways (the western and eastern  
185 routes) by which FAW may annually invade eastern China, during four separate waves of  
186 migration (March–April, April–May, May–June, and July). The western route originates in  
187 Myanmar and Yunnan, and develops via Guizhou and Sichuan (Fig. 1). To model this  
188 route, trajectories were started from all potential departure points at every 1° grid for the  
189 following schemes: from (i) Myanmar and Yunnan in March–April; (ii) Yunnan in May; (iii)  
190 Yunnan and Guizhou in June; and (iv) Yunnan and Guizhou in July (Fig. 2, Fig. S1).  
191 Myanmar and Yunnan were selected due to the fact that FAW has been present during the  
192 first winter period of 2019, and Guizhou was selected because many trajectories from  
193 Yunnan reached this province in May.

194 The eastern route starts in northern Indochina, Guangxi and Guangdong, and  
195 develops via east-central China towards the main corn-producing regions in North and  
196 Northeast China (Fig. 1). To model this route, trajectories were started from all potential  
197 departure points at every 1° grid for the following schemes: from (i) Thailand, and Laos /

198 Vietnam, in March–April; (ii) Guangxi and Guangdong in April–May; (iii) Hunan / Jiangxi,  
199 and south Hubei / south Anhui, in May–June; and (iv) Hubei / Anhui, and Jiangsu /  
200 Shandong, in July (Fig. 2, Fig. S1). The first two schemes were selected based on current  
201 (April 2019) distribution of FAW, while the latter two schemes were selected based on the  
202 results of the trajectories originating from the first two schemes earlier in the season.

203 We simulated the FAW trajectories by using average meteorological conditions at  
204 flight altitude from the past 5 years (2014–2018). In total, >0.6 million trajectories were  
205 calculated (Table S2), making this the largest study of FAW migration pathways  
206 conducted.

207

#### 208 **2.4. Effect of flight altitude on migration trajectories**

209 To investigate whether flight altitude would have affected distance and directional  
210 components of the trajectories, we carried out a comparative analysis to see how three  
211 migration parameters varied with altitude. Firstly, we calculated the average distance  
212 travelled during the three nights of migratory flight at each of the modelled flight heights  
213 (between 500 and 2250 m amsl in the western pathway, and between 500 and 1500 m  
214 amsl in the eastern pathway), to see how distance varied with height across the regions  
215 and seasons. Secondly, we looked at how the mean direction of the trajectories varied with  
216 altitude. Thirdly, we investigated the degree of directional spread of the trajectories with  
217 altitude. For each altitude, we used the Rayleigh test for circular data <sup>41</sup> to calculate the  
218 mean direction and the r-value of the circular distribution of the directions of the trajectory  
219 endpoints from the starting locations. The Rayleigh r-value ranges from 0 to 1, with higher

220 values indicating a greater clustering of directions around the mean and lower values  
221 indicating a wider angular spread of trajectory endpoints. These three parameters  
222 therefore indicate the effect that flight altitude selection will have on (i) the distance  
223 travelled during migratory flights, (ii) the mean direction of windborne transport, and (iii) the  
224 degree of dispersion or concentration that will occur over many nights of migratory flight.

225

### 226 **3. RESULTS**

227

#### 228 **3.1. The Western Migratory Pathway**

229 The first detection of FAW in the East/Southeast Asian region occurred in Myanmar and  
230 Yunnan (in the winter period of 2018/19)<sup>9, 10</sup>, so we ran our first trajectories from these  
231 areas during March–April. In both cases, the endpoints of these trajectories (the first wave  
232 of migration) largely remained within Yunnan province indicating a rather slow northward  
233 spread (Fig. 2). However, interestingly, some trajectories from Yunnan reached the  
234 southeast corner of Guizhou province in this period, and this coincided precisely with the  
235 location of a FAW outbreak discovered in late-April 2019.<sup>12</sup> The second wave of migration  
236 moved much further from Yunnan, with many trajectories ending in Guizhou (Fig. 2) and  
237 yet others travelling further east where they entered the eastern migratory pathway (see  
238 below). During June (the third wave of migration), trajectories from Guizhou moved in a  
239 northwards direction and FAW arrived in central China (eastern Sichuan, Chongqing and  
240 southern Shaanxi). The fourth wave of migration during July took FAW into the more  
241 easterly provinces of southern Shanxi, Henan and southern Shandong (Fig. 2). Our

242 trajectory simulations therefore show that FAW moths migrating along the western  
243 pathway will reach the North China Plain during the fourth wave of migration (by July).

244

### 245 **3.2. The Eastern Migratory Pathway**

246 Migration trajectories originating from Thailand, and from Laos / Vietnam, during  
247 March–April (the first migration wave) had a high probability of ending in southern China.  
248 Trajectories from Thailand reaching China were concentrated mostly in Guangxi, while  
249 those from Laos / Vietnam also had many endpoints in Guangxi, but in addition extended  
250 further north and east, into most of Guangdong and also the southern parts of Hunan and  
251 Jiangxi (Fig. 3). During the next stage of trajectories (the second migration wave),  
252 modelled from Guangxi and Guangdong during April–May, FAW were predicted to  
253 continue travelling further north and east into China, reaching the southern fringe of the  
254 Yangtze River Valley. Guangxi trajectories were directed to the northeast and terminated  
255 mainly in Hunan, but with many endpoints also in Jiangxi and the southern regions of  
256 Hubei and Anhui (Fig. 3). Trajectories from Guangdong had a more easterly component,  
257 and were concentrated in Jiangxi, Fujian and the southern part of Zhejiang (Fig. 3).

258 The third wave of migration was modelled from the Hunan / Jiangxi region, and the  
259 south Hubei / south Anhui region, during May–June. The northward progression of the  
260 migration continued in this period, although the distance travelled was relatively small and  
261 trajectory endpoints were mostly concentrated in the region between the Yangtze and  
262 Yellow River Valleys, in the provinces of Hubei, Anhui, Henan, Jiangsu and Shandong (Fig.  
263 3). This partly overlaps with the important corn-growing region of the North China Plain

264 (Fig. 1). The fourth wave of migration during July involved a longer distance movement to  
265 the northeast than in the third wave. Trajectories originating in Hubei / Anhui, and in  
266 Jiangsu / Shandong, extended to the northern part of the North China Plain (Hebei), and  
267 also reached important corn-growing regions in the Northeast China plain (Liaoning and  
268 Jilin) and North Korea (Fig. 3). Our trajectory simulations therefore show that FAW moths  
269 migrating along the eastern pathway will reach the North China Plain during the third wave  
270 of migration (by June, that is a month earlier than the western pathway), and will then  
271 reach the Northeast China Plain during the fourth wave (in July).

272

### 273 **3.2. Effect of flight altitude on migration trajectories**

274 In order to assess the role that flight altitude selection may have on migration pathways,  
275 we analysed how distance, direction and degree of directional clustering of the trajectories  
276 varied with altitude at each location (Fig. 4, Table S3). Trajectory height had a strong effect  
277 on the distance travelled at some locations, but the direction of the trend with altitude  
278 varied between sites, and in other regions there was no effect of altitude. In the western  
279 flyway, early in the season most trajectories from Myanmar and Yunnan were  
280 comparatively short irrespective of flight height (Fig. 4, Table S3) due to relatively cool air  
281 temperatures, which explains why the initial northward spread from this region was rather  
282 slow during March–April (Fig. 2). Later in the season however, as air temperatures  
283 warmed, flight altitude had a large effect on distance travelled, with trajectories at  
284 heights >1500 m producing considerably longer trajectories than lower altitudes in Yunnan  
285 (typically 800–1000 km versus <500 km), but with the opposite trend in Guizhou where

286 flight below 1000 m produced the longest trajectories (Fig. 4, Table S3). Directions varied  
287 with altitude in a complicated fashion across the different regions and time periods (Table  
288 S3). The degree of directional clustering of trajectories tended to follow a regular pattern,  
289 with tighter distributions occurring at high and low altitudes, but with a much greater  
290 degree of dispersion at intermediate heights (Fig. 4).

291 Along the eastern pathway, trajectories tended to become longer and more tightly  
292 clustered with increasing altitude in the Indochina Peninsula and southern China during  
293 spring (Fig. 4). However, this patterns changed during late-spring and summer as the  
294 moths moved further north into eastern China, with trajectory distance showing no pattern  
295 with altitude but trajectory directions becoming more dispersed with increasing altitude in  
296 the Yangtze and Yellow River Valleys and the North China Plain (Fig. 4). Once again,  
297 directions varied in a complicated manner with altitude (Table S3).

298

#### 299 **4. DISCUSSION**

300 In this study, we predicted future migration pathways of FAW in eastern China using a  
301 trajectory analysis approach, combined with flight behaviour of FAW and meteorological  
302 data from the past 5 years. Our results show that FAW will likely undertake annual  
303 migrations from its new overwintering area in the Indochina Peninsula and South China  
304 into the two main corn-producing areas of eastern China. The North China Plain (mainly  
305 Henan, Shandong and Hebei) is predicted to be invaded in June each year after three  
306 waves of migration along the eastern pathway, and then to receive another influx in July  
307 due to a fourth wave of migrants coming from the western pathway. The Northeast China

308 Plain (Liaoning, Jilin and Heilongjiang) will then be invaded by a fourth wave of migrants in  
309 July that originate for the population colonising North China a month previously. This likely  
310 annual migration pathway will result in substantial damage and economic losses to corn  
311 production in these two vitally important areas unless the FAW population can be  
312 effectively managed.

313 Many species of insect carry out similar seasonal long-distance migrations in East  
314 Asia<sup>42</sup>, including the most serious crop pests in this region, such as the oriental armyworm,  
315 beet armyworm, cotton bollworm, rice leaf roller and rice planthoppers (*Nilaparvata lugens*  
316 and *Sogatella fucifera*). Entomological radar studies have shown that the smaller,  
317 relatively weak-flying species, such as the rice leaf roller and planthoppers, do not have  
318 adaptive, wind-related, preferred flight headings or flight altitudes, and simply fly with  
319 random orientation at the altitude where they reach their flight temperature threshold.<sup>43-45</sup>  
320 This means these species will be passively transported downwind, with little or no  
321 influence over their migration trajectories.<sup>42, 46</sup> However, these weak-flying insects are still  
322 capable of carrying out annual round-trip migrations between their winter-breeding regions  
323 in Southeast Asia / South China, and summer-breeding regions much further north in East  
324 Asia. This is because they can benefit from the seasonally-favourable winds that dominate  
325 in this region, due to the passage of the East Asian monsoon.<sup>30, 47</sup> This persistent  
326 large-scale weather system produces frequent winds from the southwest in the spring and  
327 summer, and then switches to frequent winds from the north in the autumn, over the entire  
328 East Asian migration arena, thus providing suitable transporting flows for insect migrants  
329 over the whole flight season.<sup>43, 47</sup> Our study of likely FAW migration trajectories is entirely



330 consistent with this situation, and our modelling suggests that FAW only need to take-off  
331 and climb to a few hundred meters above ground to achieve rapid, long-distance transport  
332 towards eastern China during the spring. The migration system can therefore evolve  
333 without any further specialised behaviours, simply due to the high frequency of  
334 seasonally-favourable tailwinds. Presumably the progeny of the fourth wave will start to  
335 return to the south from August onwards, though this idea still needs to be formally tested.

336       Simple reliance on seasonal patterns of suitable winds however is still a rather risky  
337 and inefficient strategy, and more powerful fliers (such as noctuid moths) could  
338 considerably improve the efficiency of their migratory flights, and reduce migration-related  
339 mortality<sup>28</sup>, by adopting beneficial flight behaviours. Radar studies of moth migration in  
340 Europe<sup>35, 42, 48</sup> have clearly demonstrated that a closely related species of migrant moth,  
341 the silver Y *Autographa gamma*, has a syndrome of related behavioural traits which  
342 significantly increase the speed, distance, directionality and success of its migratory flights.  
343 These flight behaviours include the ability to detect and respond to the downwind direction,  
344 restricting migration to nights with seasonally-favourable high-altitude tailwinds, selecting  
345 the altitude with the fastest wind, and common orientation in seasonally-preferred  
346 migration directions.<sup>42, 49-52</sup> There is growing evidence that these behaviours are probably  
347 widespread in larger insect migrants<sup>53, 54</sup>, including Asian pest moths such as Oriental  
348 armyworm and cotton bollworm.<sup>20, 21</sup> It would thus seem very likely that FAW populations in  
349 Asia will already have, or will rapidly evolve, some (or all) of these behaviours, and these  
350 flight behaviours will have a major impact on their trajectories.

351       In our trajectories the only flight behaviour we encoded into our model was a

352 self-powered flight vector of 3 m/s in the downwind direction, whichever way the wind blew.  
353 We did not allow moths to be selective of whether to migrate or not (depending on the wind  
354 direction), nor did we allow them to orientate in seasonally-beneficial directions or select  
355 flight altitudes based on wind speed. These decisions were made simply because we  
356 know virtually nothing about the flight behaviour of the FAW populations in Asia, and we  
357 felt it safer not to make too many assumptions for the purpose of this study. However, our  
358 preliminary exploration of the impact some of these behaviours can have on migration  
359 trajectories (see Fig. 4) clearly shows that an understanding of flight behaviour will be  
360 crucial for accurately predicting the migration pathways and future range of this moth in  
361 East Asia. Behavioural studies of FAW populations in southern China should thus be  
362 carried out as a matter of urgency.

363       There are many similarities in the ecology and biology of FAW and Oriental armyworm,  
364 including their migratory capability, body size and self-powered flight speed, wide host  
365 range and pest status, and latitudinal extent of their breeding ranges, and thus it may be  
366 assumed that the two species will have a similar migration pattern and phenology in East  
367 Asia. The Oriental armyworm typically has only two steps in its northwards migration into  
368 northeast China. The first step involves migration from its overwintering area south of the  
369 Yangtze River into the plains between the Yangtze River and Yellow River (30°–35°N) in  
370 March and April. The next generation then migrates as far north as Northeast China and  
371 eastern Inner Mongolia, in a single step by May–June.<sup>22, 23, 55</sup> However, our results indicate  
372 that FAW will require three migration steps to reach the North China Plain in June, and four  
373 steps to reach Northeast China in July. Thus its migration pattern is quite different from

374 that of the Oriental armyworm, presumably due to differences in their minimum  
375 temperature for survival: 13.8°C for FAW, but only 9.6°C for Oriental armyworm.<sup>13, 40, 56</sup> The  
376 year-round distribution of FAW in East Asia is restricted to the relatively warm and moist  
377 regions found on the Indochina Peninsula and in southern China (to the south of the Tropic  
378 of Cancer)<sup>13</sup>, similar to rice planthoppers and the rice leaf roller.<sup>25, 46</sup> Oriental armyworm  
379 on the other hand can survive over winter in the region south of the Yangtze River (33 °N)  
380 in China, considerably further north than FAW.<sup>57</sup> Due to their similar body size (and thus  
381 flight capability and speed), and similar developmental periods (about one month per  
382 generation under suitable temperature conditions), it is expected they will achieve similar  
383 migration distances each year, and thus the occurrence area of FAW will be further south  
384 than the Oriental armyworm at any one time.

385       The East Asian migration arena would appear to be a highly suitable environment for  
386 the FAW, having suitable wind regimes for migration, suitable climate for rapid  
387 development and widespread availability of corn. However, other factors may influence its  
388 spread throughout the region, including distribution of alternative host plants, natural  
389 enemies and competitors. The phenotype of FAW in Africa, Myanmar and Yunnan has  
390 been identified as the corn strain, and the rice strain appears to be largely absent.<sup>25, 46</sup>  
391 However, as FAW populations arrive in South China, they will encounter large areas of rice  
392 paddies, and relatively infrequent corn cultivation, which will affect its population growth.  
393 Another factor which will determine population growth is the prevalence of natural enemies,  
394 which may be expected to be low for a newly-invasive species. However, field surveys in  
395 Yunnan found that 15–20% of FAW caterpillars were infected by parasitoid wasps

396 (unpublished data from G.P Li in Henan Academy of Agricultural Sciences), which is  
397 encouraging from the perspective of population suppression via natural biological control.  
398 In addition, FAW populations in East Asia will also encounter new competitors such as the  
399 Oriental armyworm and the Asian corn borer *Ostrinia furnacalis*. None of these factors  
400 were considered in our trajectory modelling, and we believe that ecological studies of FAW  
401 populations as they colonise East Asia should be undertaken as a priority.

402 In conclusion, the major corn-growing regions of China face a high risk of invasion by  
403 FAW. The North China and Northeast China Plains can be invaded by FAW via a series of  
404 3–4 steps of northward migration, which will allow FAW to reach as far north as the border  
405 of Jilin with Heilongjiang by July. The most efficient way to prevent invasive species from  
406 entering a new country is efficient border quarantine. However, the ability of FAW to carry  
407 out long-range, windborne migration means that traditional methods of surveillance and  
408 quarantine are useless. When this study was began in January 2019, the FAW was only  
409 known from Myanmar and Yunnan, and we wanted to know if it could invade the rest of the  
410 Southeast and East Asian areas. In the intervening 4 months before this paper was  
411 submitted in May 2019, FAW had already spread to Thailand, Laos, Vietnam, Guangxi,  
412 Guangdong, Guizhou and Hunan, and its continuing spread through China to the north  
413 and east seems inevitable. Additional studies on its migration patterns, flight behaviour,  
414 ecology, and pest management are urgently required.

415

#### 416 **ACKNOWLEDGMENTS**

417 This work was supported though grants to G.H. by the National Natural Science

418 Foundation of China (31822043) and the Natural Science Foundation of Jiangsu Province  
419 (BK20170026). B.G.'s visiting scholarship to the University of Exeter was funded by the  
420 China Scholarship Council and the Jiangsu Graduate Research and Innovation Projects.  
421 J.W.C. was supported by the Science and Technology Facilities Council (STFC) Newton  
422 Agritech Project "Integrating advanced earth observation and environmental information  
423 for sustainable management of crop pests and diseases" (ST/N006712/1) and the  
424 National Natural Science Foundation of China (61661136004).

425

426 **DECLARATION OF INTERESTS**

427 The authors declare that they have no competing interests.

428

429

430 **REFERENCES**

- 431 1. Johnson SJ, Migration and the life history strategy of the fall armyworm, *Spodoptera*  
432 *frugiperda* in the western hemisphere. *International Journal of Tropical Insect Science*,  
433 **8**: 543-549 (1987)
- 434 2. Westbrook JK, Nagoshi RN, Meagher RL, Fleischer SJ, Jairam S, Modeling seasonal  
435 migration of fall armyworm moths. *Int. J. Biometeorol.* **60**: 255–267 (2016)
- 436 3. Abrahams P, Bateman M, Beale T, Colotley V, Cock M, Colmenarez Y, Corniani N, Day  
437 R, Early R, Godwin J, Gomez J, Moreno PG, Murphy ST, Oppong-Mensah B, Phiri N,  
438 Pratt C, Richards G, Silvestri S and Witt A, Fall armyworm: impacts and implications for  
439 Africa, Evidence Note (2), September 2017. Report to DFID. Wallingford, UK: CAB  
440 International. (2017)
- 441 4. Rwomushana I, Bateman M, Beale T, Beseh P, Cameron K, Chiluba M, Clotley V, Davis  
442 T, Early R, Godwin J, Gonzalez-Moreno P, Kansiime M, Kenis M, Makale F, Mugambi I,  
443 Murphy S, Nunda W, Phiri N, Pratt C and Tambo J, Fall armyworm: impacts and  
444 implications for Africa Evidence Note Update, October 2018. Report to DFID.  
445 Wallingford, UK: CAB International (2018)
- 446 5. Stokstad E. New crop pest takes Africa at lightning speed. *Science.* **356**: 473–474  
447 (2017)
- 448 6. Sharanabasappa, Kalleshwaraswamy CM, Asokan R, Mahadeva SHM, Maruthi MS,  
449 Pavithra HB, Hegde K, Navi S, Prabhu ST and Goergen G, First report of the fall

- 450 armyworm, *Spodoptera frugiperda* (J E Smith) (Lepidoptera: Noctuidae), an alien  
451 invasive pest on maize in India. *Pest Management in Horticultural Ecosystems* **24**:  
452 23-29 (2018)
- 453 7. IPPC, First detection of Fall Army Worm on the border of Thailand. IPPC Official Pest  
454 Report, No. THA-03/1. FAO: Rome, Italy. <https://www.ippc.int/> (2018)
- 455 8. IPPC, First Detection Report of the Fall Armyworm *Spodoptera frugiperda* (Lepidoptera:  
456 Noctuidae) on Maize in Myanmar. IPPC Official Pest Report, No. MMR-19/2. Rome,  
457 Italy: FAO. <https://www.ippc.int/> (2019)
- 458 9. National Agricultural Technology Extension Service Center (NATESC), Major pest  
459 *Spodoptera frugiperda* have invaded in Yunnan, and all areas should immediately  
460 strengthen investigation and monitoring. Plant pathogen and pest information.  
461 2019-1-18 (2019)
- 462 10. National Agricultural Technology Extension Service Center (NATESC). *Spodoptera*  
463 *frugiperda* harms winter corn in 3 cities and states in southwestern Yunnan. Plant  
464 pathogen and pest information. 2019-1-31 (2019)
- 465 11. National Agricultural Technology Extension Service Center (NATESC), Recent reports  
466 of fall armyworm in China and neighbouring countries. Plant pathogen and pest  
467 information. 2019-4-4, (2019)
- 468 12. National Agricultural Technology Extension Service Center (NATESC). Recent reports  
469 of fall armyworm in China. Plant pathogen and pest information. 2019-4-26 (2016)
- 470 13. Early R, Gonzalez-Moreno P, Murphy, ST and Day R, Forecasting the global extent of

- 471 invasion of the cereal pest *Spodoptera frugiperda*, the fall armyworm. *NeoBiota*, **40**:  
472 25–50 (2018)
- 473 14. Casmuz A, Juárez ML, Socías MG, Murúa MG, Prieto S, Medina S, Willink E and  
474 Gastaminza G, Review of the host plants of fall armyworm, *Spodoptera frugiperda*  
475 (Lepidoptera: Noctuidae). *Rev. Soc. Entomol. Argent.* **69**: 209–231 (2010)
- 476 15. Hruska AJ and Gould F, Fall Armyworm (Lepidoptera: Noctuidae) and *Diatraea*  
477 *lineolata* (Lepidoptera: Pyralidae): Impact of larval population level and temporal  
478 occurrence on maize yield in Nicaragua. *J. Econom. Entom.* **90**: 611-622 (1997)
- 479 16. Rose AH, Silversides RH, Lindquist OH. Migration flight by an aphid, *Rhopalosiphum*  
480 *maidis* (Hemiptera: Aphididae), and a noctuid, *Spodoptera frugiperda* (Lepidoptera:  
481 Noctuidae). *Canada Entologist*, **107**:567–576 (1975)
- 482 17. Jeger M, Bragard C, Caffier D, Candresse T, Chatzivassiliou E, Dehnen-Schmutz K,  
483 Gilioli G, Gregoire JC, Miret JAJ, Jeger M, MacLeod A, Navarro MN, Niere B, Parnell S,  
484 Potting R, Rafoss T, Rossi V, Urek G, Van Bruggen A, Van der Werf W, West J and  
485 Winter S, Pest risk assessment of *Spodoptera frugiperda* for the European Union.  
486 EFSA Journal **16**: 5351 (2018)
- 487 18. Feng HQ, Wu KM, Cheng DF and Gao YY, Radar observations of the autumn  
488 migration of the beet armyworm *Spodoptera exigua* (Lepidoptera: Noctuidae) and other  
489 moths in northern China. *B. Entomol. Res.* **93**: 115–124 (2003)
- 490 19. Feng Q, Wu K, Cheng D and Guo Y, Spring migration and summer dispersal of  
491 *Loxostege sticticalis* (Lepidoptera: Pyralidae) and other insects observed with radar in



- 492 northern China. *Environ. Entomol.* **33**: 1253–1265 (2004)
- 493 20. Feng HQ, Wu KM, Ni YX, Cheng DF and Gao YY, Return migration of *Helicoverpa*  
494 *armigera* (Lepidoptera: Noctuidae) during autumn in northern China. *B. Entomol. Res.*  
495 **95**: 361–370 (2005)
- 496 21. Feng HQ, Zhao XC, Wu XF, Wu B, Wu KM, Cheng DF and Guo YY, Autumn migration  
497 of *Mythimna separata* (Lepidoptera: Noctuidae) over the Bohai Sea in northern China,  
498 *Environ. Entomol.* **37**: 774–781 (2008)
- 499 22. Chen RL, A model of oriental armyworm migration, in *Physiology and Ecology of*  
500 *Oriental Armyworm*, ed. By Lin CS, Chen RL, Shu XY, Hu BH and Cai XM, Peking  
501 University Press, Beijing. pp 322–335 (1990)
- 502 23. Chen RL, Sun YJ, Wang SY, Zhai BP, Bao XY, Migration of the oriental armyworm  
503 *Mythimna separata* in East Asia in relation to weather and climate. I. Northeastern  
504 China, in *Insect Migration: Tracking Resources through Space and Time*. Ed. By Drake  
505 VA and Gatehouse AG, Cambridge University Press, Cambridge, UK. pp. 93–104  
506 (1995).
- 507 24. Hu G, Wu QL, Wu XW, Jiang YY, Zeng J and Zhai BP. Outbreak mechanism of second  
508 generation armyworms in northeastern China: A case study in 1980. *Chinese Journal*  
509 *of Applied Entomology*, **51**: 943–957 (2014)
- 510 25. Wang FY, Yang F, Lu MH, Luo SY, Zhai BP, Lim KS, McInerney CE and Hu G,  
511 Determining the migration duration of rice leaf folder (*Cnaphalocrocis medinalis*  
512 Guenée) moths using a trajectory analytical approach. *Sci. Rep-UK.* **7**: 39853 (2017)

- 513 26. Nagoshi RN, Meagher RL and Hay-Roe M. Inferring the annual migration patterns of  
514 fall armyworm (Lepidoptera: Noctuidae) in the United States from mitochondrial  
515 haplotypes. *Ecol. Evol.* **2**:1458–1467 (2012)
- 516 27. Chapman JW, Nesbit RL, Burgin LE, Reynolds DR, Smith AD, Middleton DR and Hill  
517 JK. Flight orientation behaviors promote optimal migration trajectories in high-flying  
518 insects. *Science*, **327**: 682–685 (2010)
- 519 28. Chapman JW, Bell JR, Burgin LE, Reynolds DR, Pettersson LB, Hill JK, Bonsall MB  
520 and Thomas JA, Seasonal migration to high latitudes results in major reproductive  
521 benefits in an insect. *PNAS*, **109**: 14924–14929 (2012)
- 522 29. Wu QL, Hu G, Westbrook JK, Sword GA and Zhai BP, An advanced numerical  
523 trajectory model tracks a corn earworm moth migration event in Texas, USA. *Insects*, **9**:  
524 115 (2018)
- 525 30. Wu QL, Hu G, Tuan HA, Xiao Chen, Ming-Hong Lu, Zhai BP and JW Chapman,  
526 Migration patterns and winter population dynamics of rice planthoppers in Indochina:  
527 New perspectives from field surveys and atmospheric trajectories. *Agr. Forest Meteorol.*  
528 **265**: 99–109 (2019)
- 529 31. Hu G, Lu F, Lu MH, Liu WC, Xu WG, Jiang XH and Zhai BP, The influence of typhoon  
530 Khanun on the return migration of *Nilaparvata lugens* (Stål) in Eastern China. *PLoS*  
531 *ONE*, **8**: e57277 (2013)
- 532 32. Hu G, Lu MH, Tuan HA, Liu WC, Xie MC, McInerney CE and Zhai BP, Population  
533 dynamics of rice planthoppers, *Nilaparvata lugens* and *Sogatella furcifera* (Hemiptera,

- 534 Delphacidae) in Central Vietnam and its effects on their spring migration to China. *B.*  
535 *Entomol. Res.* **107**: 369–381 (2017)
- 536 33. Ma J, Wang YC, Hu YY, Lu MH, Wan GJ, Chen FJ, Liu WC, Zhai BP and Hu G, Brown  
537 planthopper *Nilaparvata lugens* (Stål) was concentrated at the rear of Typhoon  
538 Soudelor in Eastern China in August 2015. *Insect Sci.* **25**: 916–926 (2018)
- 539 34. Skamarock WC, Klemp JB, Dudhia J, Gill DO, Barker DM, Duda MG, Huang XY, Wang  
540 W, Powers JG, A description of the advanced research WRF version 3. NCAR  
541 Technical Note. NCAR/TN-475, 125–125 (2008).
- 542 35. Drake VA and Reynolds DR, *Radar Entomology: Observing Insect Flight and Migration.*  
543 CABI, Wallingford, UK (2012)
- 544 36. Minter M, Pearson A, Lim KS, Wilson K, Chapman JW, Jones CM, The tethered flight  
545 technique as a tool for studying life-history strategies associated with migration in  
546 insects. *Ecol. Entomol.* **43**: 397–411 (2018)
- 547 37. Westbrook JK, Noctuid migration in Texas within the nocturnal aeroecological  
548 boundary layer. *Integr. Comp. Biol.* **48**: 99–106 (2008)
- 549 38. Wolf WW, Westbrook JK, Raulston JR, Pair SD and Hobbs SE, Recent airborne radar  
550 observations of migrant pests in the United States. *Philos. Trans. R Soc. Lond. B-Biol.*  
551 *Sci.* **328**: 619–629 (1990)
- 552 39. Wolf WW, Westbrook JK, Raulston JR, Pair SD, Hobbs SE, Riley JR, Mason PJ and  
553 Joyce RJV, Radar observation of orientation of noctuids migrating from corn fields in  
554 the Lower Rio Grande Valley. *Southwest Entomologist* (Supplement), **18**: 45–61 (1995)

- 555 40. Hogg D, Pitre HN and Anderson RE, Assessment of early-season phenology of the fall  
556 armyworm (Lepidoptera: Noctuidae) in Mississippi. *Environ. Entomol.* **11**: 705–710  
557 (1982)
- 558 42. Chapman JW, Reynolds DR and Wilson K, Long-range seasonal migration in insects:  
559 mechanisms, evolutionary drivers and ecological consequences. *Ecol. Lett.* **18**:  
560 287–302 (2015)
- 561 41. Fisher NI, *Statistical Analysis of Circular Data*. Cambridge University Press,  
562 Cambridge, UK (1993)
- 563 43. Riley JR, Cheng XX, Zhang XX, Reynolds DR, Xu GM, Smith AD, Cheng JY, Bao AD  
564 and Zhai BP, The long-distance migration of *Nilaparvata lugens* (Stål) (Delphacidae) in  
565 China: radar observations of mass return flight in the autumn. *Ecol. Entomol.* **16**:  
566 471-489 (1991)
- 567 44. Riley JR, Reynolds DR, Smith AD, Rosenberg LJ, Cheng XN, Zhang XX, Xu GM,  
568 Cheng JY, Bao AD, Zhai BP and Wang HK, Observations on the autumn migration of  
569 *Nilaparvata lugens* (Homoptera: Delphacidae) and other pests in east central China. *B.*  
570 *Entomol. Res.* **84**: 389–402 (1994)
- 571 45. Riley JR, Reynolds DR, Smith AD, Edwards AS, Zhang XX, Cheng XN, Wang HK,  
572 Cheng JY and Zhai BP, Observations of the autumn migration of the rice leaf roller  
573 *Cnaphalocrocis medinalis* (Lepidoptera: Pyralidae) and other moths in eastern China.  
574 *B. Entomol. Res.* **85**: 397–414 (1995)
- 575 46. Chapman JW, Klaassen RHG, Drake VA, Fossette S, Hays GC, Metcalfe JD,

- 576 Reynolds AM, Reynolds DR and Alerstam T, Animal orientation strategies for  
577 movement in flows. *Curr. Biol.* **21**: R861–R870 (2011)
- 578 47. Hu G, Lu MH, Reynolds DR, Wang HK, Chen X, Liu WC, Zhu F, Wu XW, Xia F, Xie MC,  
579 Cheng XN, Lim KS, Zhai BP and Chapman JW. Long-term seasonal forecasting of a  
580 major migrant insect pest: the brown planthopper in the Lower Yangtze River Valley. *J.*  
581 *Pest Sci.* **92**: 417–428 (2019)
- 582 48. Chapman JW, Drake VA and Reynolds DR. Recent insights from radar studies of  
583 insect flight. *Ann. Rev. Entomol.* **56**: 337–356 (2011)
- 584 49. Chapman JW, Nilsson C, Lim KS, Bäckman J, Reynolds DR, Alerstam T, Reynolds AM,  
585 Detection of flow direction in high-flying insect and songbird migrants. *Curr. Biol.* **25**:  
586 R733–R752 (2015)
- 587 50. Chapman JW, Reynolds DR, Hill JK, Sivell D, Smith AD and Woiwod IP, A seasonal  
588 switch in compass orientation in a high-flying migrant moth. *Curr. Biol.* **18**: R908–909  
589 (2008)
- 590 51. Chapman JW, Reynolds DR, Mouritsen H, Hill JK, Riley JR, Sivell D, Smith AD and  
591 Woiwod IP, Wind selection and drift compensation optimize migratory pathways in a  
592 high-flying moth. *Curr. Biol.* **18**: 514–518 (2008)
- 593 52. Alerstam T, Jason W. Chapman JW, Bäckman J, Smith AD, Karlsson H, Nilsson C,  
594 Reynolds DR, Klaassen RHG and Hill JK, Convergent patterns of long-distance  
595 nocturnal migration in noctuid moths and passerine birds. *Proc. R. Soc. B-biol. Sci.* **278**:  
596 3074–3080 (2011)

- 597 53. Hu G, Lim KS, Horvitz N, Clark SJ, Reynolds DR, Sapir N and Chapman JW, Mass  
598 seasonal bioflows of high-flying insect migrants. *Science*, **354**: 1584–1587 (2016)
- 599 54. Hu G, Lim KS, Reynolds DR, Reynolds AM and Chapman JW, Wind-related  
600 orientation patterns in diurnal, crepuscular and nocturnal high-altitude insect migrants.  
601 *Front. Behav. Neurosci.* **10**: 32 (2016)
- 602 55. Pan L, Wu QL, Chen X, Jiang YY, Zeng J and Zhai BP, The formation of outbreak  
603 populations of the 3rd generation of *Mythimna separata* (Walker) in northern China.  
604 *Chinese Journal of Applied Entomology* **51**: 958–973 (2014)
- 605 56. Lin CS. **1990**. The application of the effective accumulative temperature rule on the  
606 geographic range of oriental armyworm. In *Physiology and Ecology of Oriental*  
607 *Armyworm*, ed. By Lin CS, Chen RL, Shu XY, Hu BH and Cai XM. Peking University  
608 Press, Beijing. pp. 86–109 (1990)
- 609 57. Sun JR. Field surveys on the overwintering of oriental armyworm migration. In  
610 *Physiology and Ecology of Oriental Armyworm*, ed. by Lin CS, Chen RL, Shu XY, Hu  
611 BH and Cai XM, Peking University Press, Beijing. pp 167–172 (1990).
- 612 58. Nagoshi RN, Evidence that a major subpopulation of fall armyworm found in the  
613 Western Hemisphere is rare or absent in Africa, which may limit the range of crops at  
614 risk of infestation. *PLoS One*, **14**: e0208966 (2019)
- 615 59. Nagoshi RN, Goergen G, Tounou KA, Agboka K, Koffi D and Meagher RL, Analysis of  
616 strain distribution, migratory potential, and invasion history of fall armyworm  
617 populations in northern Sub-Saharan Africa. *Sci. Rep-UK* **8**: 3710 (2018)

618 60. Zhang L, Jin MH, Zhang DD, Jinag YY, Liu J, Wu KM and Xiao YT. Molecular  
619 identification of invasive fall armyworm *Spodoptera frugiperda* in Yunnan Province.  
620 Plant Protection, **45**: 19–24 (2019)  
621

622 **Figures**

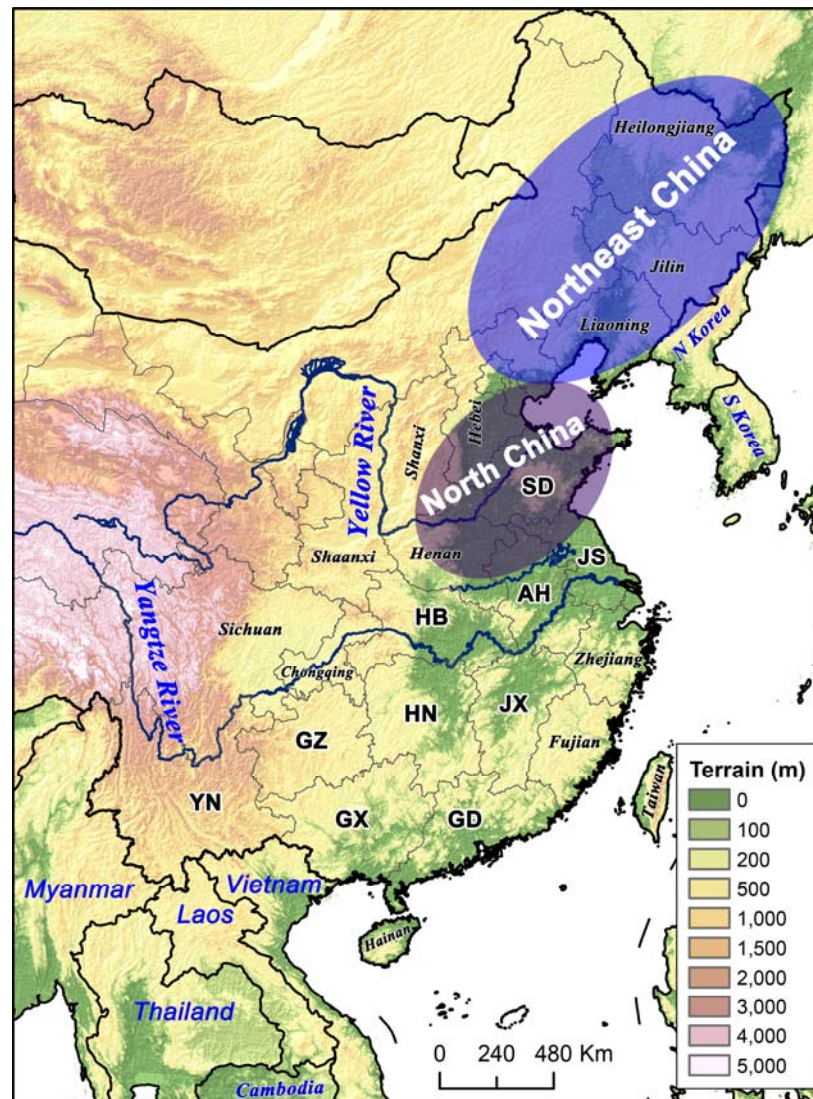

623

624

625 **Figure 1.** Topography of the East Asian study area. Most of eastern China is a large area  
626 of relatively flat land with few natural barriers to insect migration, but Southwest China  
627 (Yunnan and Sichuan) is a largely mountainous area with many barriers to migration. Corn  
628 is planted in each province in China, but the major corn-growing areas are the North China  
629 Plain and the Northeast China Plain. Simulated migration trajectories of FAW were started  
630 from Myanmar, Thailand, Laos, Vietnam and provinces in southwest, southeast and



631 east-central China indicated by a 2-letter code (YN: Yunnan, GX: Guangxi, GD:  
632 Guangdong; GZ: Guizhou, HN: Hunan, JX: Jiangxi, HB: Hubei, AH: Anhui, JS: Jiangsu,  
633 and SD: Shandong). Other provinces and countries mentioned in the text are indicated on  
634 the map. The western migratory pathway originates in Myanmar and Yunnan, and passes  
635 through Guizhou, Chongqing, Sichuan and Shaanxi before merging with the eastern  
636 pathway. The eastern migratory pathway originates in northern Thailand, Laos, Vietnam,  
637 Guangxi and Guangdong, and passes through all south-eastern and east-central  
638 provinces before ultimately reaching the North China and Northeast China Plains.

639

640

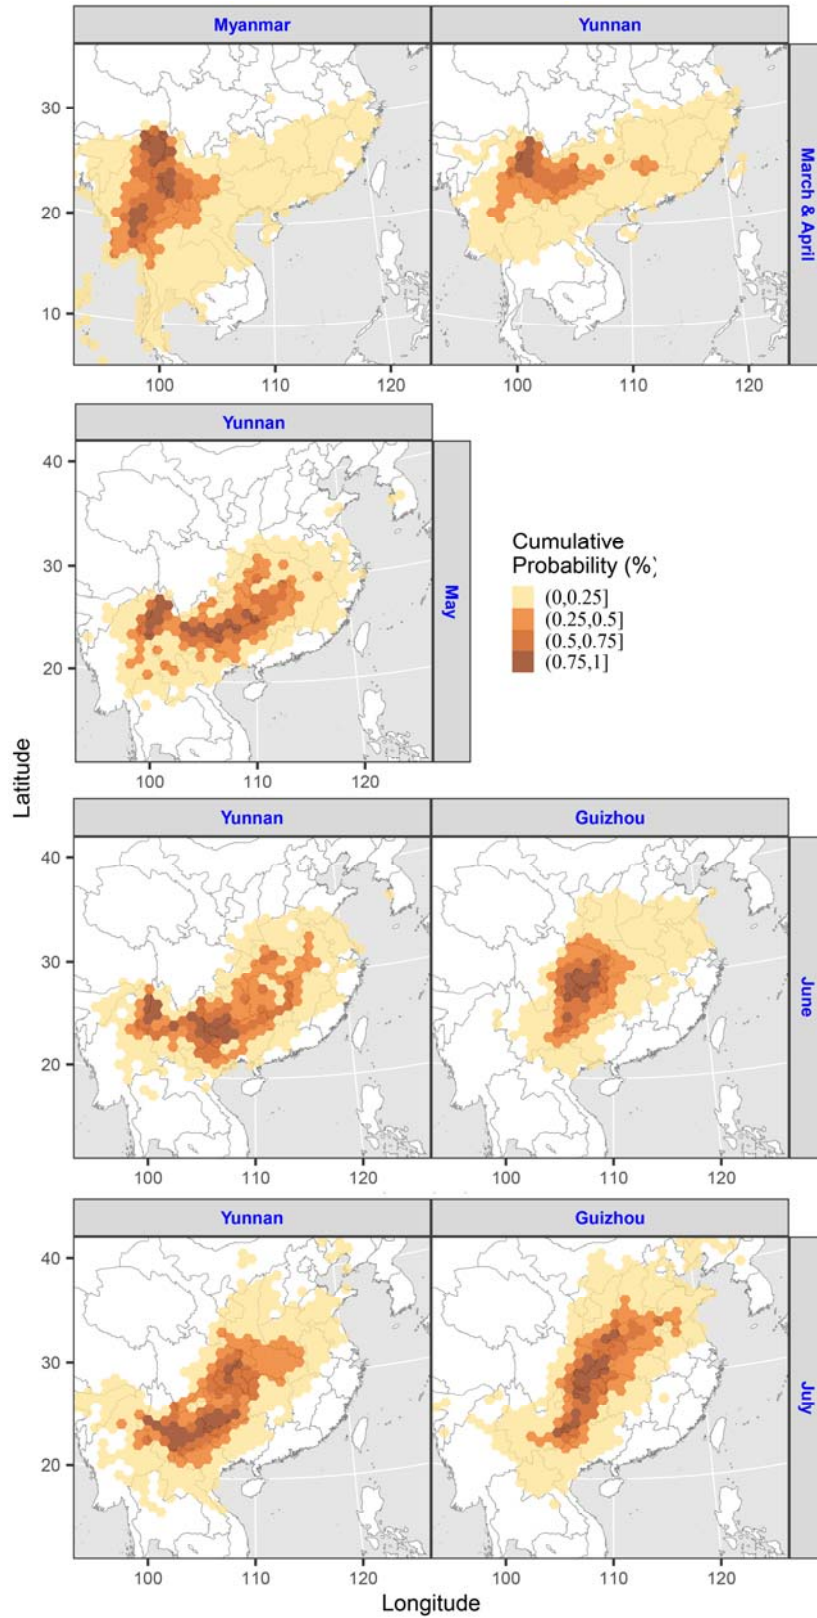

641

642

643 **Figure 2.** Distribution of endpoints of FAW forward migration trajectories along the western  
644 migratory pathway. The start-points and time periods of trajectories are labelled on the top  
645 / right of each panel. Trajectory analyses were conducted over three consecutive nights,  
646 and only the final endpoint of each 3-nights trajectory is shown. Each hexagonal cell  
647 covers 10,000 km<sup>2</sup>.

648

649

650

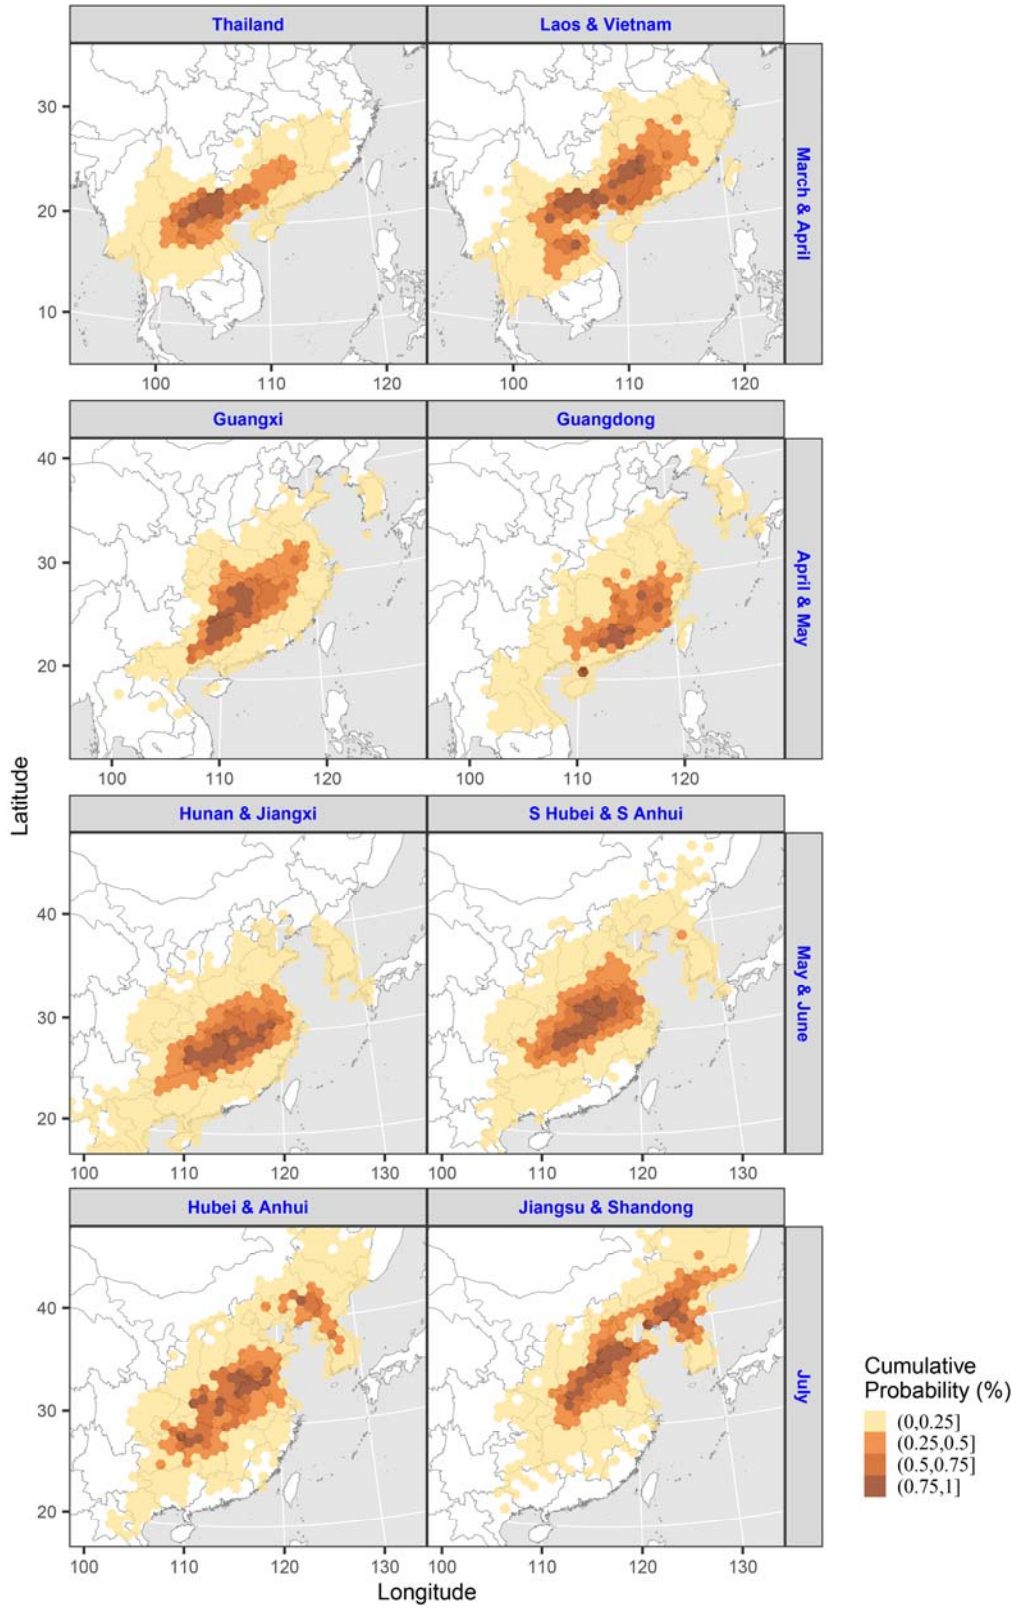

651

652

653 **Figure 3.** Distribution of endpoints of FAW forward migration trajectories along the eastern  
654 migratory pathway. The start-points and time periods of trajectories are labelled on the top  
655 / right of each panel. Trajectory analyses were conducted over three consecutive nights,  
656 and only the final endpoint of each 3-nights trajectory is shown. Each hexagonal cell  
657 covers 10,000 km<sup>2</sup>.

658

659

660

661

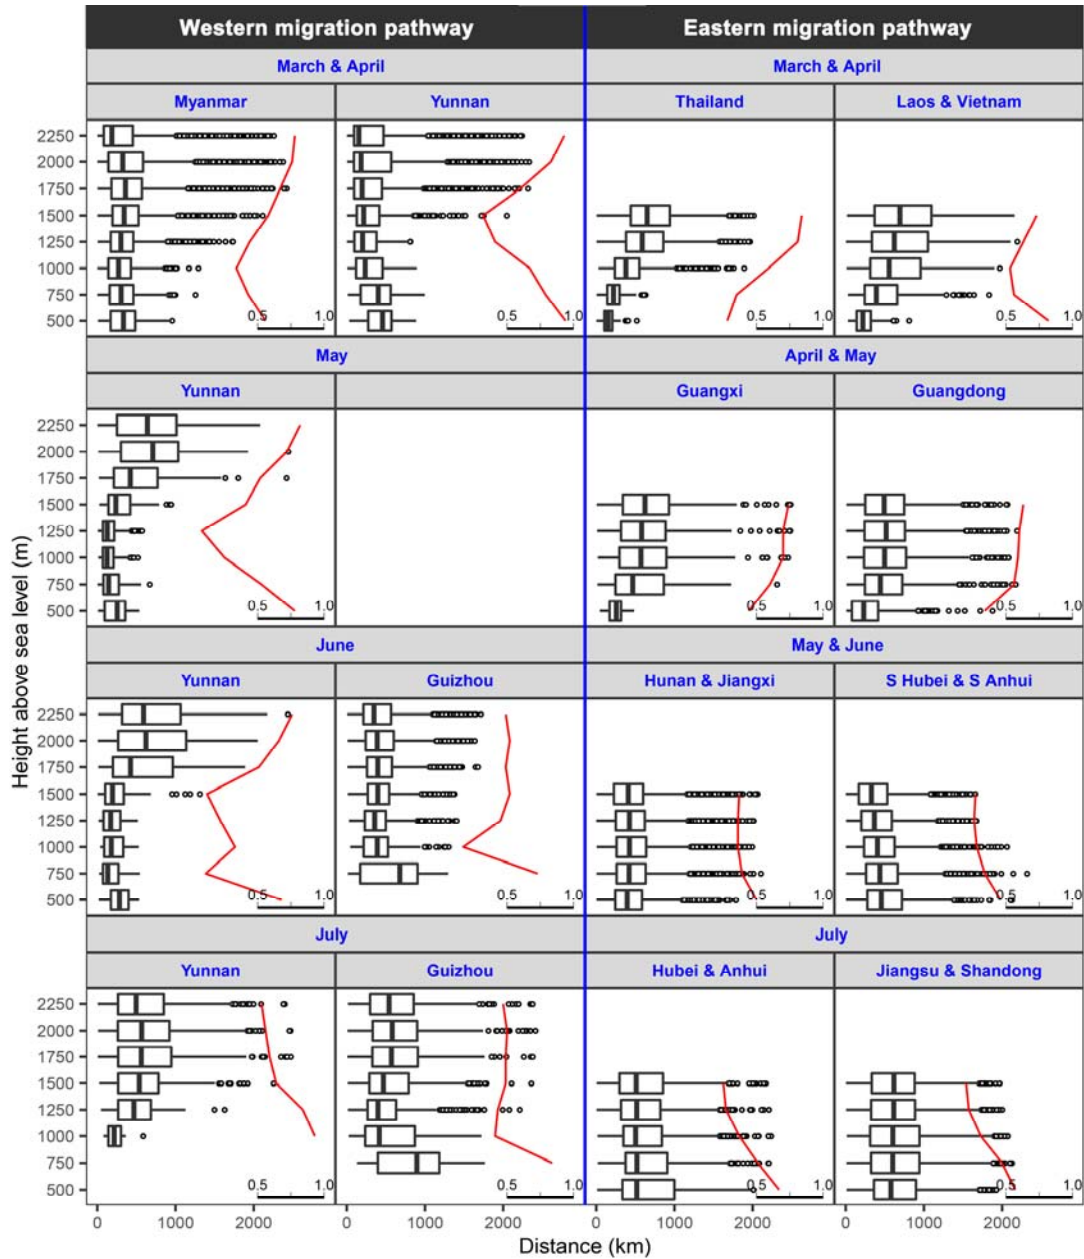

662

663

664 **Figure 4.** The effect of flight altitude on trajectory parameters. The black box plots show  
 665 the straight-line distances between the start-points and the final endpoints for each  
 666 trajectory, and how they vary with altitude. In the black box plots, central bars represent  
 667 median values, boxes represent the inter-quartile range (IQR), whiskers extend to  
 668 observations within  $\pm 1.5$  times the IQR, and dots represent outliers. The red lines (on a

669 secondary scale) show the Rayleigh test  $r$ -values for the trajectory directions at each  
670 altitude. This provides a measure of the degree of clustering of the angular distribution of  
671 directions around the mean, ranging from 0 to 1, with higher values indicating tighter  
672 clustering and thus a higher degree of common trajectory directions and lower values  
673 indicating a greater dispersion of trajectories.

674

675
